# Supplementary material for: Cooperative effects of ruthenium micellar catalysts and added surfactants in transfer hydrogenation of ketones in water
Source: Royal Society of Chemistry journal article supplement (doi:10.1039/c5cy00839e), 2015-01-01

## Cooperative effects of ruthenium micellar catalysts and added surfactants in transfer hydrogenation of ketones in water

Alexander M. Kalsin,<sup>a\*</sup> Tat'yana A. Peganova,<sup>a</sup> Valentin V. Novikov,<sup>a</sup> Maurizio Peruzzini,<sup>b\*</sup> and Luca Gonsalvi<sup>b\*</sup>

### Electronic Supplementary Information

**Table S1.** The main micellar properties of the surfactants **S** used in catalytic tests.

|                           | CTAB                    | HBAC | SDS                    | DSS                 | TX-100               | TW20 | ZW3-14 |
|---------------------------|-------------------------|------|------------------------|---------------------|----------------------|------|--------|
| <i>cmc</i> , mM           | 0.92; 0.15 <sup>a</sup> | 0.49 | 8.2; ~1.0 <sup>a</sup> | 11                  | 0.3                  | 0.06 | 0.38   |
| <i>T<sub>k</sub></i> , °C | 25; 16 <sup>b</sup>     | 25   | 10                     | 33; 49 <sup>a</sup> | -                    | -    | -      |
| <i>T<sub>c</sub></i> , °C | -                       | -    | -                      | -                   | 65; ~50 <sup>a</sup> | 76   | -      |
| Ref                       | [1,2]                   | [3]  | [4]                    | [4]                 | [5]                  | [4]  | [6]    |

*cmc* – critical micelle concentration, *T<sub>k</sub>*, °C – the Krafft temperature, *T<sub>c</sub>*, °C – the clouding temperature.

<sup>a</sup> in 1M NaCl solution. <sup>b</sup> in 0.01M NaCl solution.

**Table S2.** The micellar properties of C<sub>16</sub>H<sub>33</sub>NMe<sub>3</sub><sup>+</sup>X<sup>-</sup> (CTA<sup>+</sup>X<sup>-</sup>: X = Cl, Br) mixed with surfactants **S**.

|                                              | CTAB                             | HBAC                             | SDS     | DSS       | TX-100 | TW20 | ZW3-14                           |
|----------------------------------------------|----------------------------------|----------------------------------|---------|-----------|--------|------|----------------------------------|
| <i>cmc</i> , mM                              | ~1                               | ~0.5                             | <0.1    | 0.06-0.08 | <1     | <1   | ~0.4-1                           |
| <sup>a</sup> χ <sub>CTA</sub> <sup>mic</sup> | ~χ <sub>CTA</sub> <sup>sol</sup> | ~χ <sub>CTA</sub> <sup>sol</sup> | ~0.5    | ~0.5      |        |      | ~χ <sub>CTA</sub> <sup>sol</sup> |
| <i>T<sub>k</sub></i> , °C                    | <25                              | <25                              | 50      | <50       |        |      | -                                |
| <i>T<sub>c</sub></i> , °C                    |                                  |                                  |         |           | >>65   | >>76 | -                                |
| Mixed micelles                               | +                                | +                                | +       | +         | +      | +    | +                                |
| Ref                                          | [7]                              | [7]                              | [7a, 8] | [9]       | [6]    | [6]  | [10]                             |

*cmc* – critical micelle concentration, *T<sub>k</sub>*, °C – the Krafft temperature, *T<sub>c</sub>*, °C – the clouding temperature.

<sup>a</sup>χ<sub>CTA</sub><sup>mic</sup> – molar fraction of CTA<sup>+</sup>X<sup>-</sup> in the mixed micelle **S**/CTA<sup>+</sup>X<sup>-</sup>, χ<sub>CTA</sub><sup>sol</sup> – molar fraction of CTA<sup>+</sup>X<sup>-</sup> in the solution of **S** and CTA<sup>+</sup>X<sup>-</sup>.

**Table S3.** The micellar properties of C<sub>8</sub>H<sub>17</sub>NMe<sub>3</sub><sup>+</sup>Br<sup>-</sup> (OTAB) mixed with surfactants **S**.

|                                              | CTAB         | HBAC         | SDS     | DSS  | TX-100       | TW20         | ZW3-14       |
|----------------------------------------------|--------------|--------------|---------|------|--------------|--------------|--------------|
| <i>cmc</i> , mM                              | <sup>b</sup> | <sup>b</sup> | 0.8     |      | <sup>b</sup> | <sup>b</sup> | <sup>b</sup> |
| <sup>a</sup> χ <sub>OTA</sub> <sup>mic</sup> | <0.05        | <0.05        | ~0.5    | ~0.5 | <0.05        | <0.05        | <0.05        |
| <i>T<sub>k</sub></i> , °C                    | ~25          | ~25          | 18      | <18  | -            | -            |              |
| <i>T<sub>c</sub></i> , °C                    |              |              |         |      | >65          | >76          |              |
| Mixed micelles                               | -            | -            | +       | +    | -            | -            | -            |
| Ref                                          | [7]          | [7]          | [11, 8] | [12] | [6]          | [6]          | [10]         |

*cmc* – critical micelle concentration, *T<sub>k</sub>*, °C – the Krafft temperature, *T<sub>c</sub>*, °C – the clouding temperature.

<sup>a</sup>χ<sub>OTA</sub><sup>mic</sup> – molar fraction of OTAB in the mixed micelle **S**/OTAB, χ<sub>OTA</sub><sup>sol</sup> – molar fraction of OTAB in the solution of **S** and OTAB. <sup>b</sup> the *cmc* of the mixed system is close to the *cmc* of the added surfactant **S**.

#### References:

- [1] J. Roy, M. N. Islam and G. Aktaruzzaman, *J. Surfact. Deterg.*, 2014, **17**, 231-242.
- [2] T. Imae and S. Ikeda, *Colloid Polym. Sci.*, 1987, **265**, 1090-1098.

- [3] Gonzalez-Perez, A.; Czapkiewicz, J.; Castillo, J.L.D.; Rodriguez, J.R. *Colloids Surfaces A*, 2001, **193**, 129-137.
- [4] N. M. van Os, J. R. Haak and L. A. M. Rupert, *Physico-Chemical Properties of Selected Anionic, Cationic and Nonionic Surfactants*, Elsevier, Amsterdam, **1993**, p. 608.
- [5] K. Panchal, A. Desai and T. Nagar, *Journal Dispersion Sci. Technol.*, 2006, **27**, 33-38.
- [6] G. Qu, J. Cheng, J. Wei, T. Yu, W. Ding and H. Luan, *J. Surfact. Deterg.*, 2011, **14**, 31-35.
- [7] a) A. Shiloach and D. Blankschtein, *Langmuir*, 1998, **14**, 1618-1636; b) J.L. Rodríguez, M.B. Sierra, P.V. Messina, M.A. Morini, P.C. Schulz, P.D. Burgo, E. Junquera, A. Rodríguez and E. Aicart, *J. Colloid Interface Sci.*, 2007, **314**, 699-706. c) P. C. Schulz, J. L. Rodriguez, R. M. Minardi, M. B. Sierra and M. A. Morini, *J. Colloid Interface Sci.*, 2006, **303**, 264-271.
- [8] A. Renoncourt, *Study of supra-aggregates in catanionic surfactant systems*, University of Regensburg, Institute of Physical and Theoretical Chemistry, PhD thesis, **2005**.
- [9] L. S. Hao, Y. T. Deng, L. S. Zhou, H. Ye, Y. Q. Nan and P. Hu, *J. Phys. Chem. B* **2012**, *116*, 5213-5225.
- [10] A.A. McLachlan and D.G. Marangoni, *J. Colloid Interface Sci.*, 2006, **295**, 243-248.
- [11] a) T. Kato, M. Iwai and T. Seimiya, *J. Colloid Interface Sci.*, 1989, **130**, 439-447; b) T. Kato, H. Takeuchi and T. Seimiya, *J. Colloid Interface Sci.*, 1990, **140**, 253-257.
- [12] L. Chen, J. X. Xiao and J. M. Ma, *Colloid Polym. Sci.*, 2004, **282**, 524-529.

**Figure S1.** Transfer hydrogenation conversions (%) of ketone **1** catalyzed by RuL<sup>16</sup> (solid symbols) and RuL<sup>8</sup> (empty symbols) in the presence of surfactants **S**: (A) and (B) anionic surfactants, (C) and (D) cationic, non-ionic and zwitter-ionic surfactants. Conditions:  $T = 60\text{ }^{\circ}\text{C}$ , H<sub>2</sub>O (4 mL), HCOONa (1.25 M), **1** (0.25 M), RuL<sup>n</sup> (0.25 mM), RuL<sup>n</sup>/**1**/HCO<sub>2</sub>Na = 1/1000/5000. The ratio **S**/RuL<sup>n</sup> is given in the brackets.

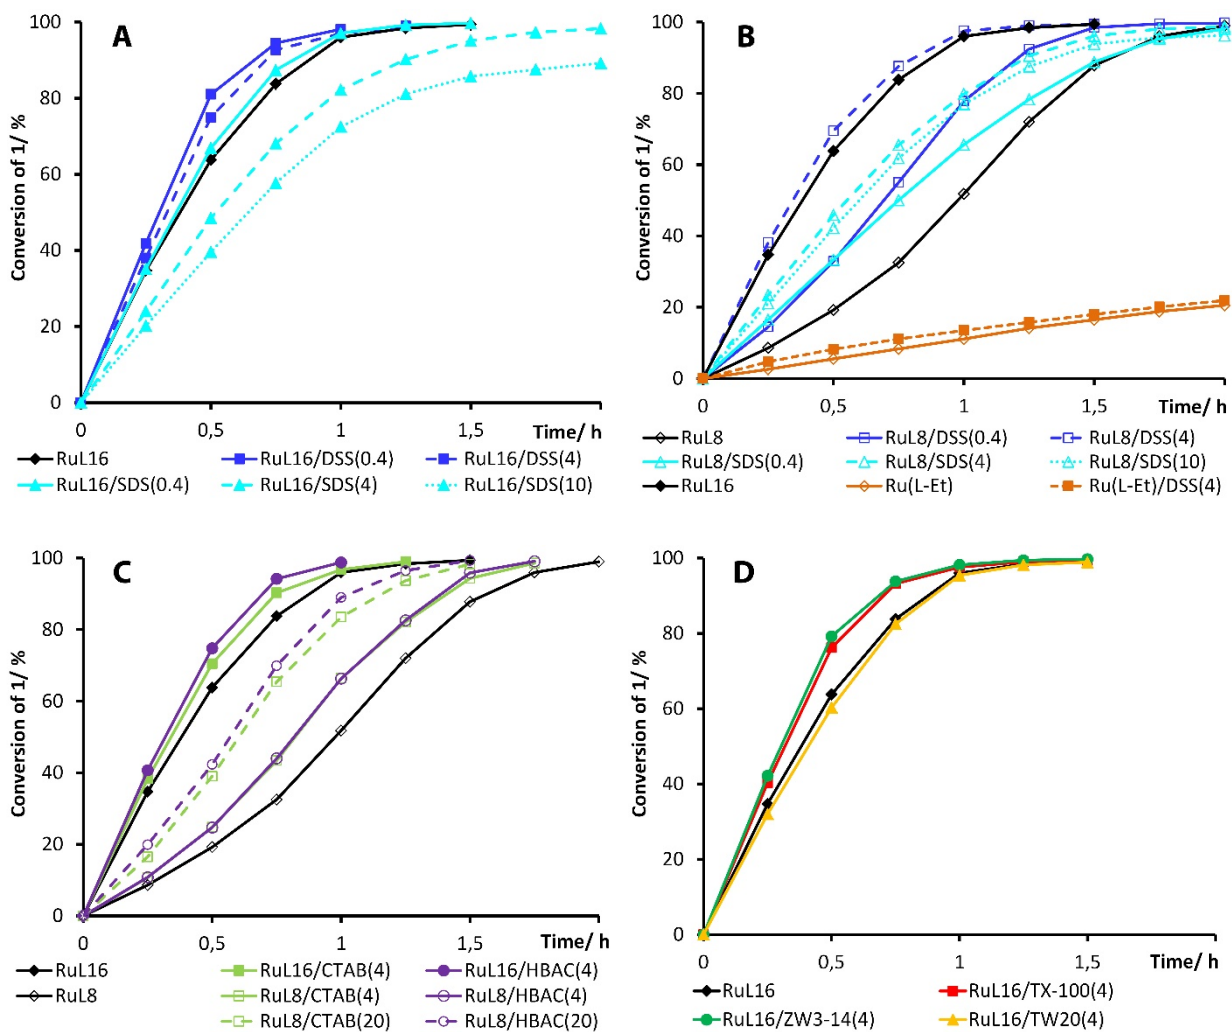

**Figure S2.** Transfer hydrogenation conversions (%) of ketone **2** catalyzed by RuL<sup>16</sup> (solid symbols) and RuL<sup>8</sup> (empty symbols) in the presence of surfactants **S**: (A) anionic surfactants, (B) and (E) cationic, non-ionic and zwitter-ionic surfactants. Conditions:  $T = 60\text{ }^{\circ}\text{C}$ ,  $\text{H}_2\text{O}$  (4 mL),  $\text{HCOONa}$  (1.25 M), **2** (0.25 M), RuL<sup>n</sup> (0.625 mM), RuL<sup>n</sup>/2/HCO<sub>2</sub>Na = 1/400/2000. The ratio **S**/RuL<sup>n</sup> is given in the brackets.

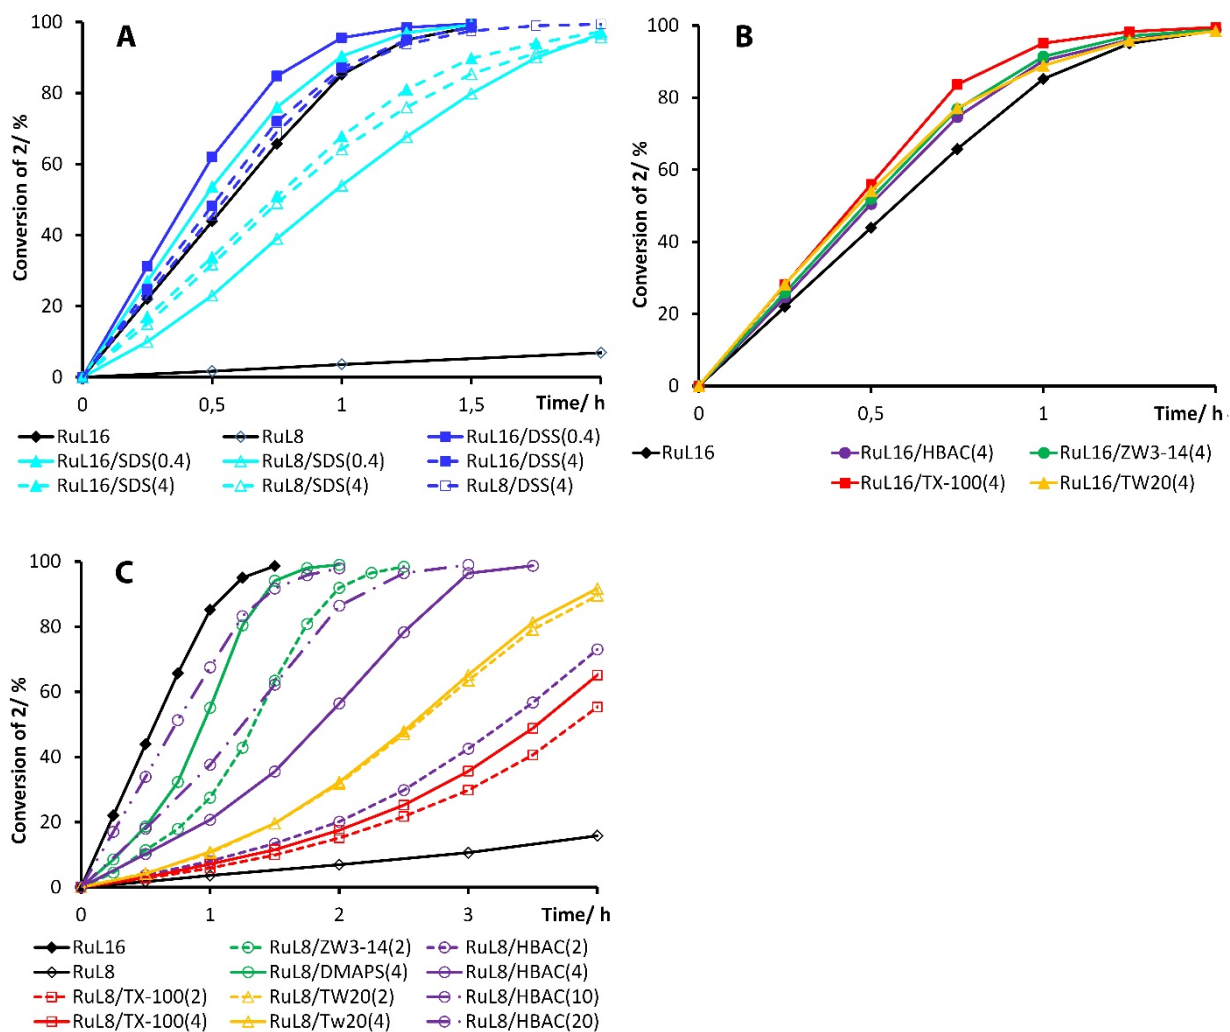

**Figure S3.** Transfer hydrogenation conversions (%) of ketone **3** catalyzed by  $\text{RuL}^{16}$  (solid symbols) and  $\text{RuL}^8$  (empty symbols) in the presence of surfactants **S**: (A) anionic surfactants, (B) cationic, non-ionic and zwitter-ionic surfactants. Conditions:  $T = 60\text{ }^\circ\text{C}$ ,  $\text{H}_2\text{O}$  (4 mL),  $\text{HCOONa}$  (1.25 M), **3** (0.25 M),  $\text{RuL}^n$  (0.625 mM),  $\text{RuL}^n/\text{3}/\text{HCO}_2\text{Na} = 1/400/2000$ . The ratio  $\text{S}/\text{RuL}^n$  is given in the brackets.

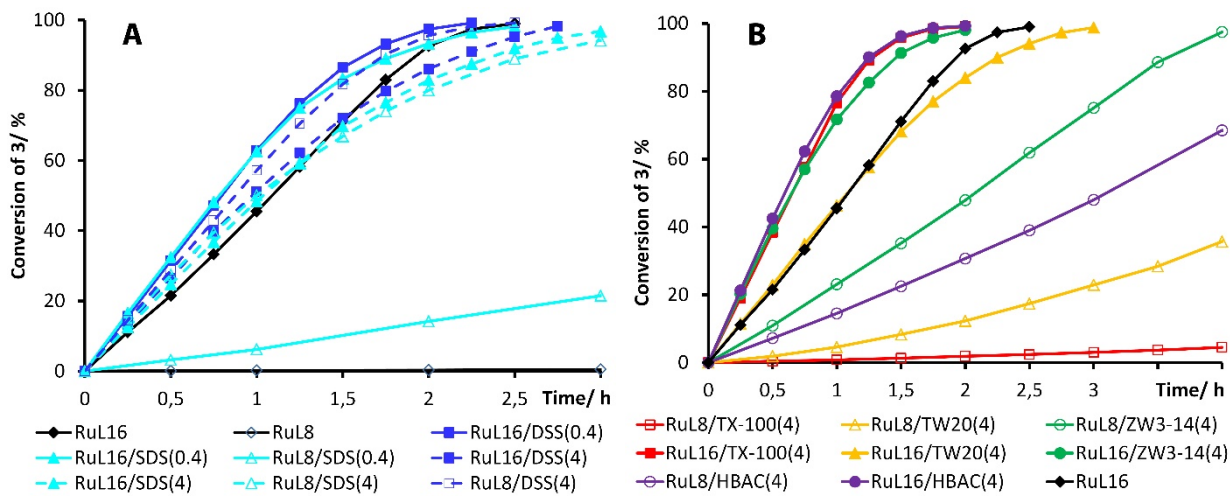

**Figure S4.** DOSY NMR spectra for the complex  $\text{RuL}^8$  in  $\text{D}_2\text{O}$  in the presence of 2 equiv. of surfactants **S**: (A) **S** = HBAC, (B) **S** = ZW3-14, (C) **S** = TX-100, (D) **S** = TW20. Axis x – chemical shift (ppm), axis y – diffusion coefficient ( $\log D$ ).

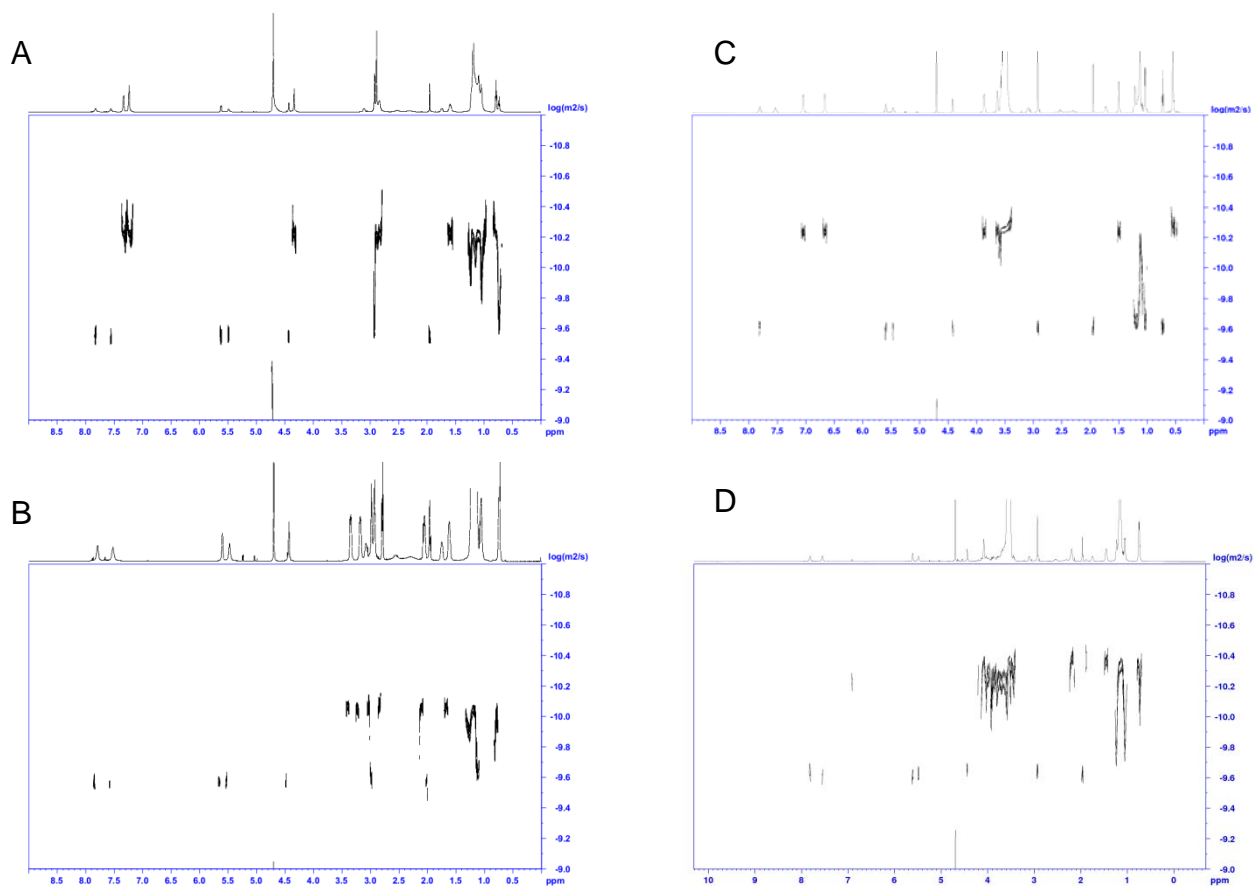

**Figure S5.** Diffusion-dependent signal attenuation of the complex  $\text{RuL}^8$  (squares) and the surfactants **S** (triangles) in  $\text{D}_2\text{O}$  solution: (A) **S** = HBAC, (B) **S** = ZW3-14, (C) **S** = TX-100, (D) **S** = TW20. The continuous lines represent the fit to the experimental data using the diffusion coefficients given in the Table 3. The signals with the following chemical shifts were used for the computation of the signal decay curves: 5.60 ppm ( $\text{RuL}^8$ ), 7.22 ppm (HBAC), 3.34 ppm (ZW3-14), 3.86 ppm (TX-100), 1.45 ppm (TW20).

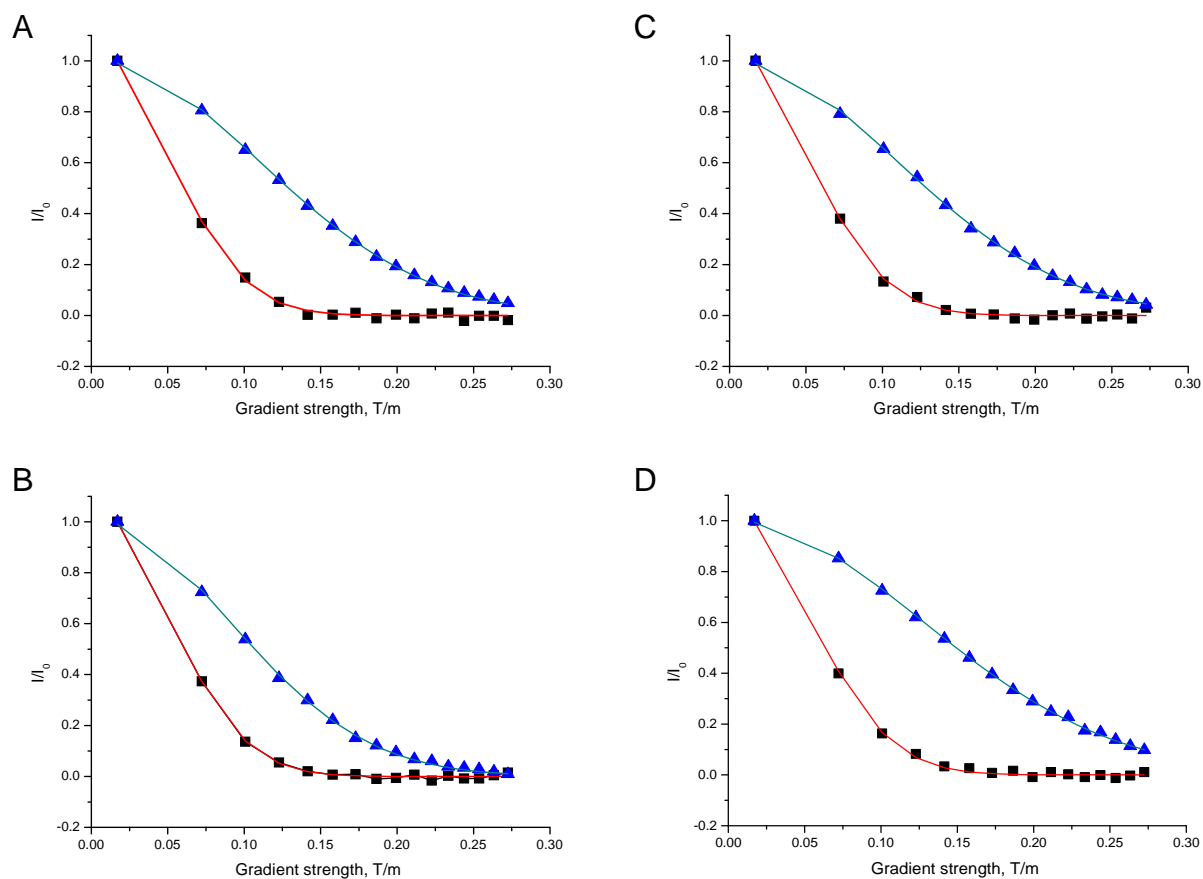

Supplement: c5cy00839e1.pdf [file c5cy00839e1.pdf]
